# Supplementary material
Source: PubMed Central journal article supplement (PMC5663183)
Supplement: NIHMS913461-supplement-Supplemental_Figure_1_.pdf [file NIHMS913461-supplement-Supplemental_Figure_1_.pdf]

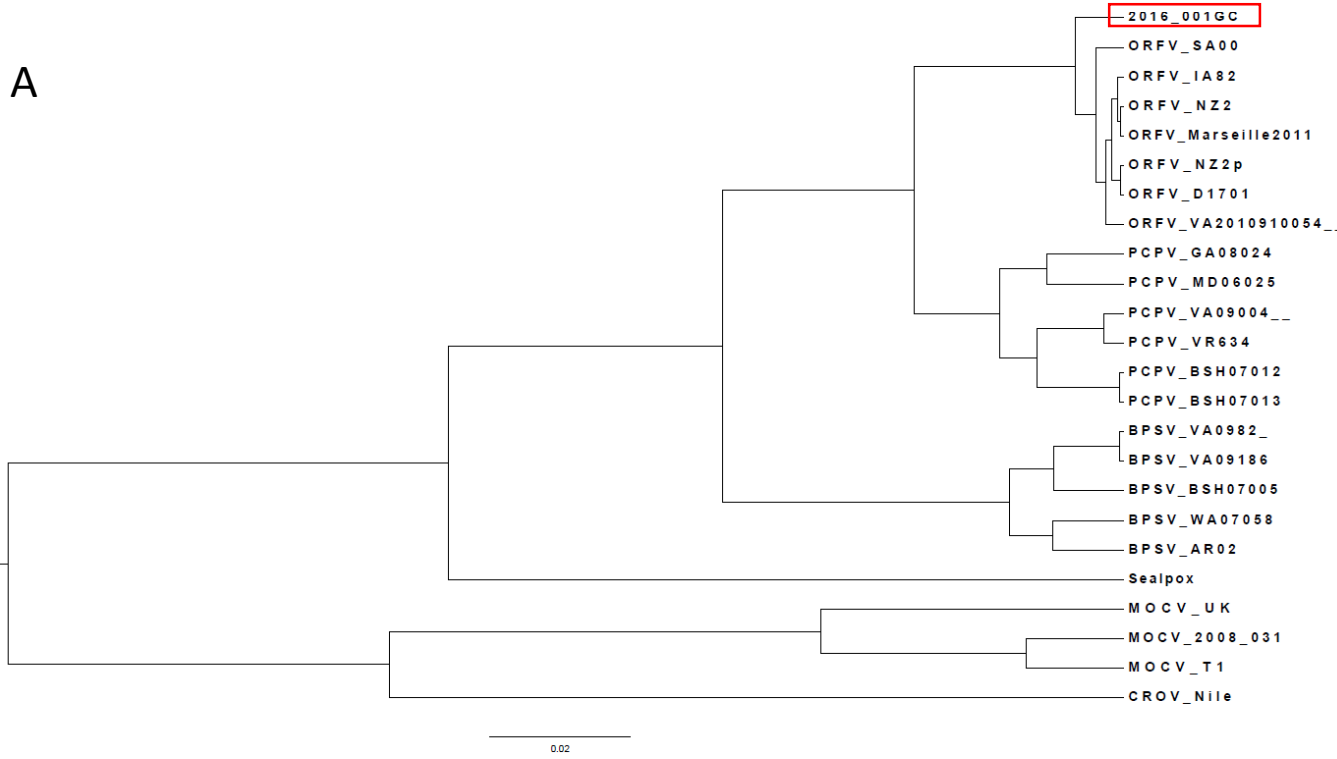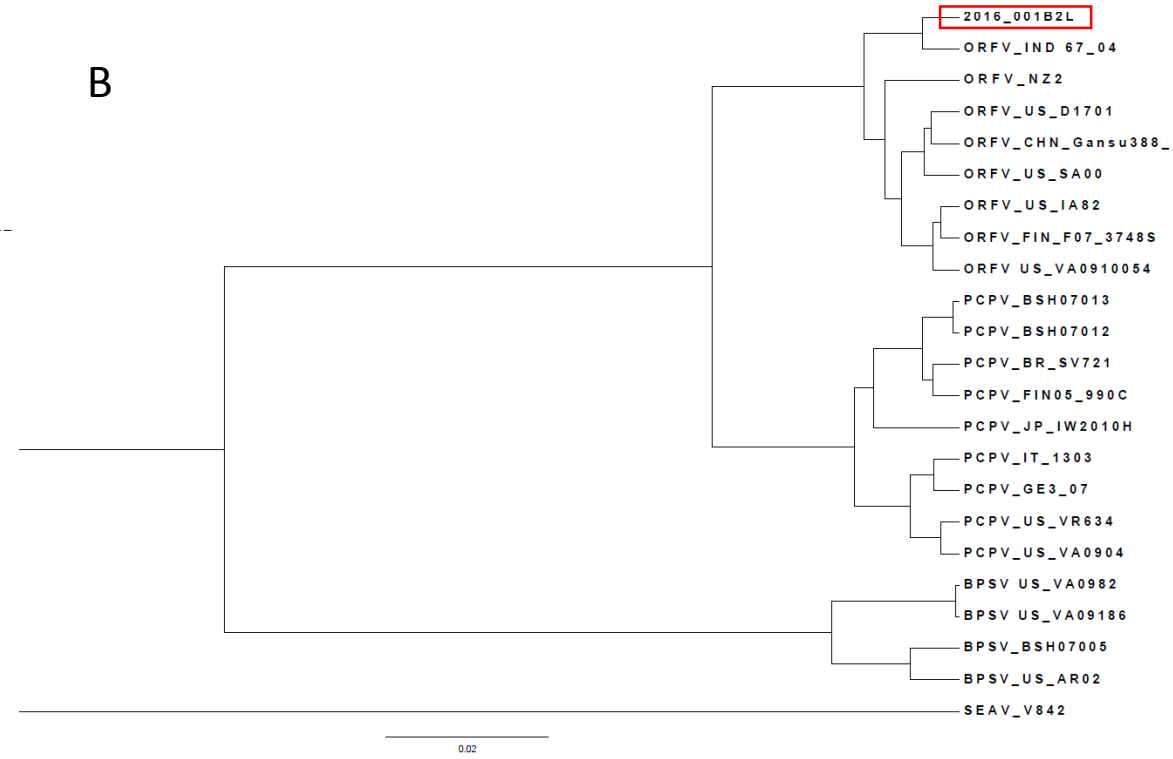

Supplementary Figure 1. Phylogenetic trees of known ORF virus isolates based on (A) an amplicon from conserved high GC rich regions of the genome (case isolate 2016\_001GC), and (B) an amplicon from ORF virus J6R gene (case isolate 2016\_001B2L). Both trees confirm the ORF virus isolate from this case group among known ORF viruses and that it is most related to an ORF virus isolate from India (ORFV\_IND 67\_04).
